# Supplementary material
Source: PubMed Central journal article supplement (PMC6093743)

Supplemental Figure 1

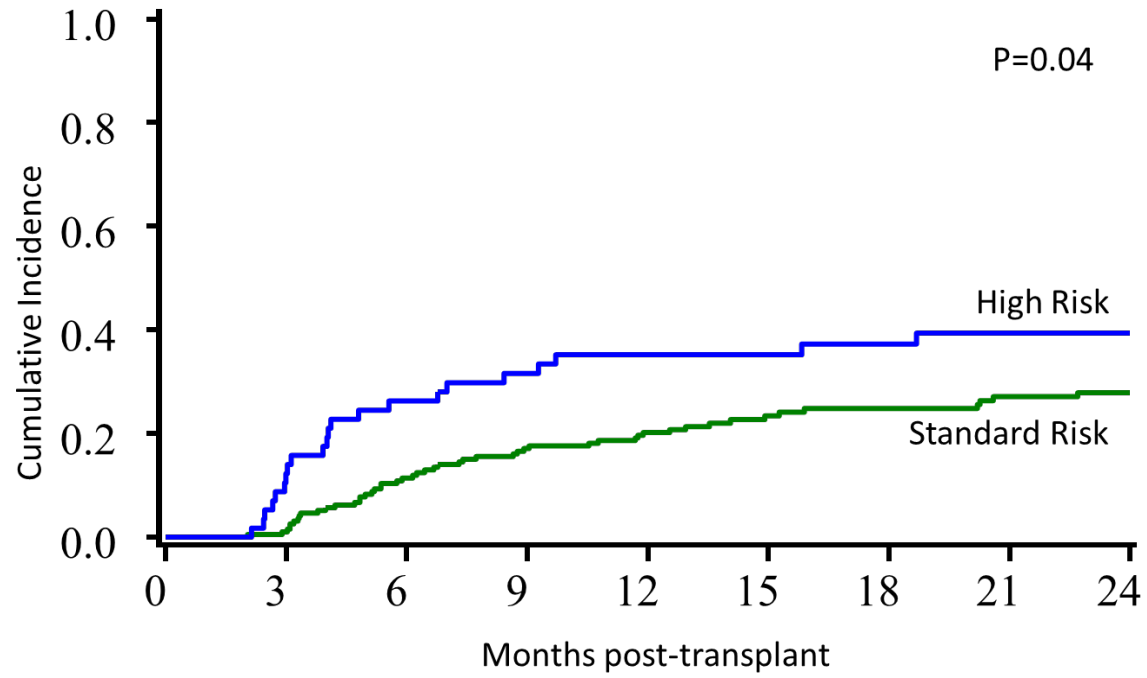

Supplemental Figure 2

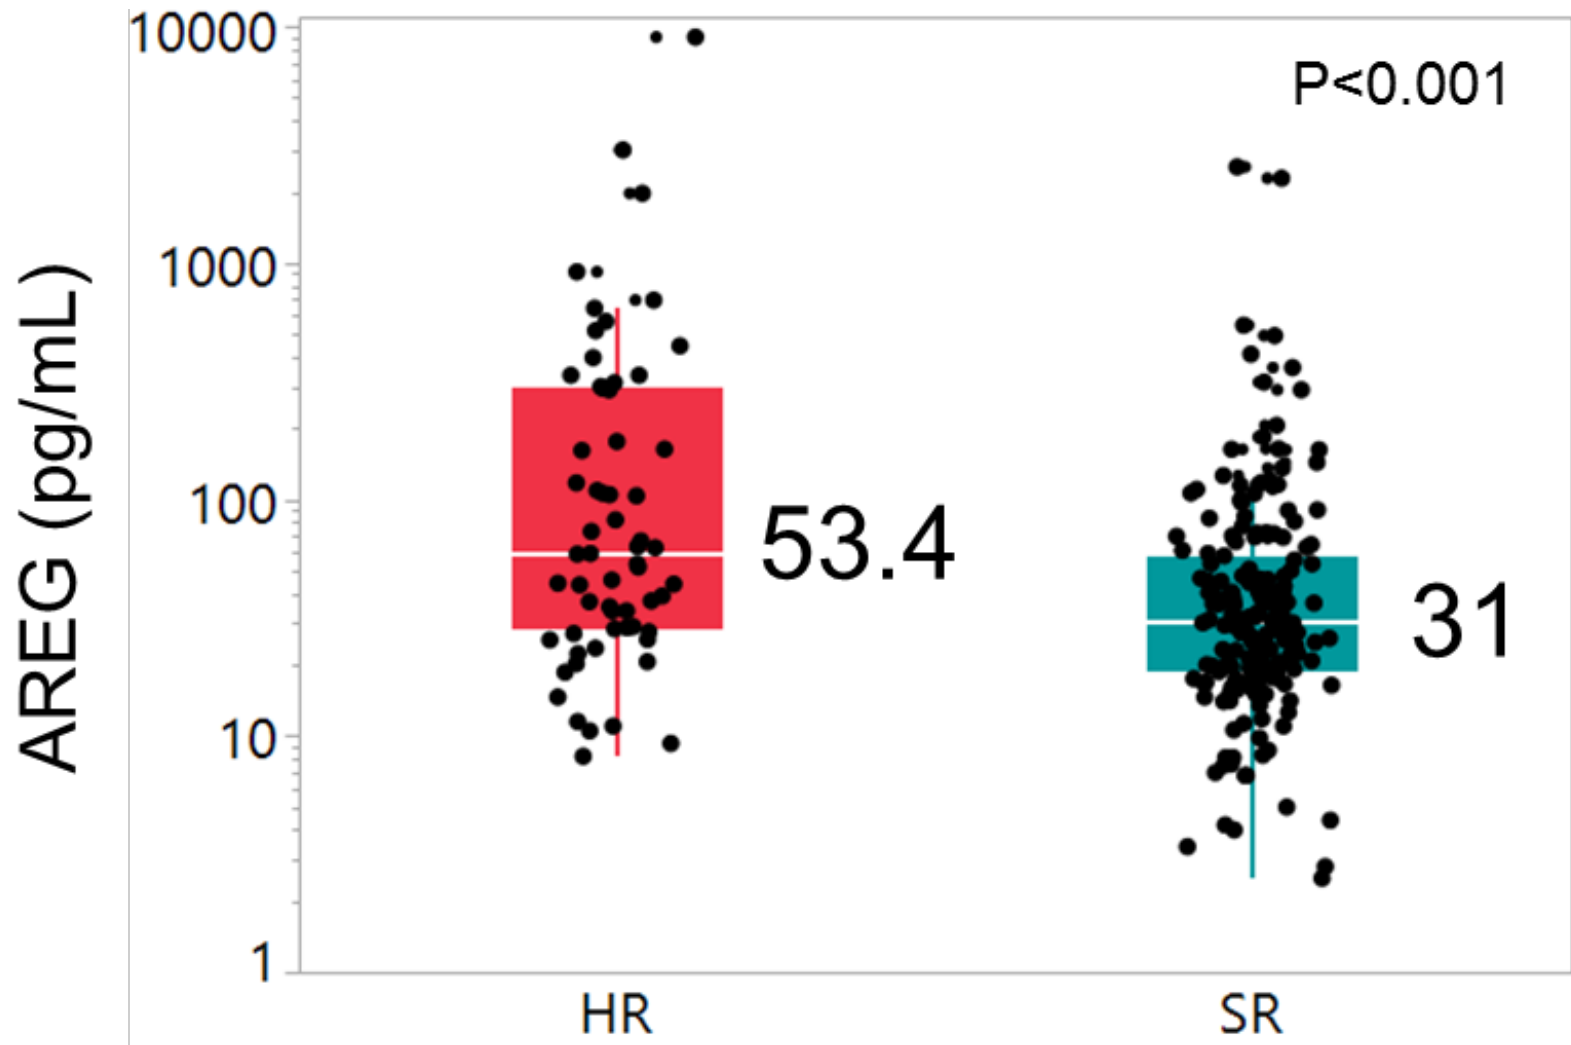

Supplemental Figure 3

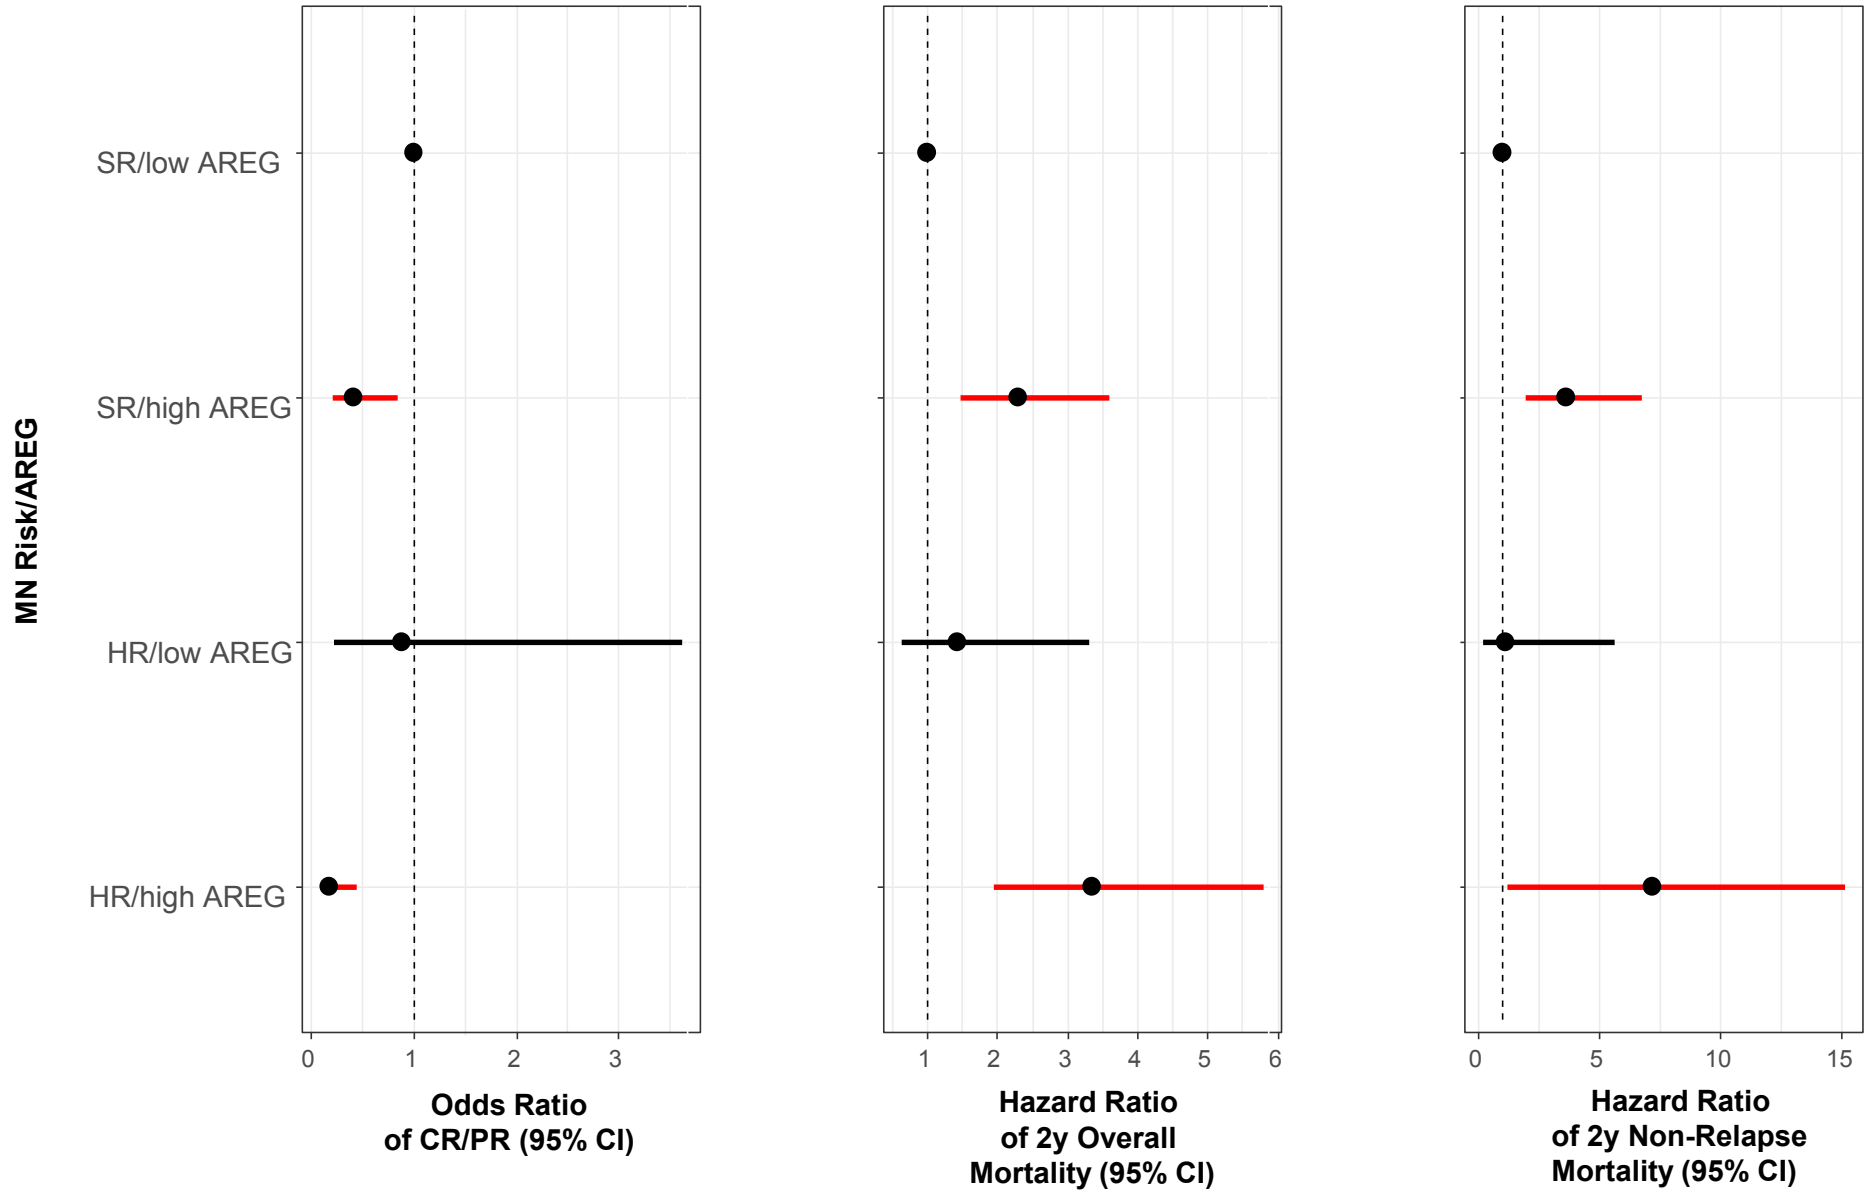

Supplemental Figure 4

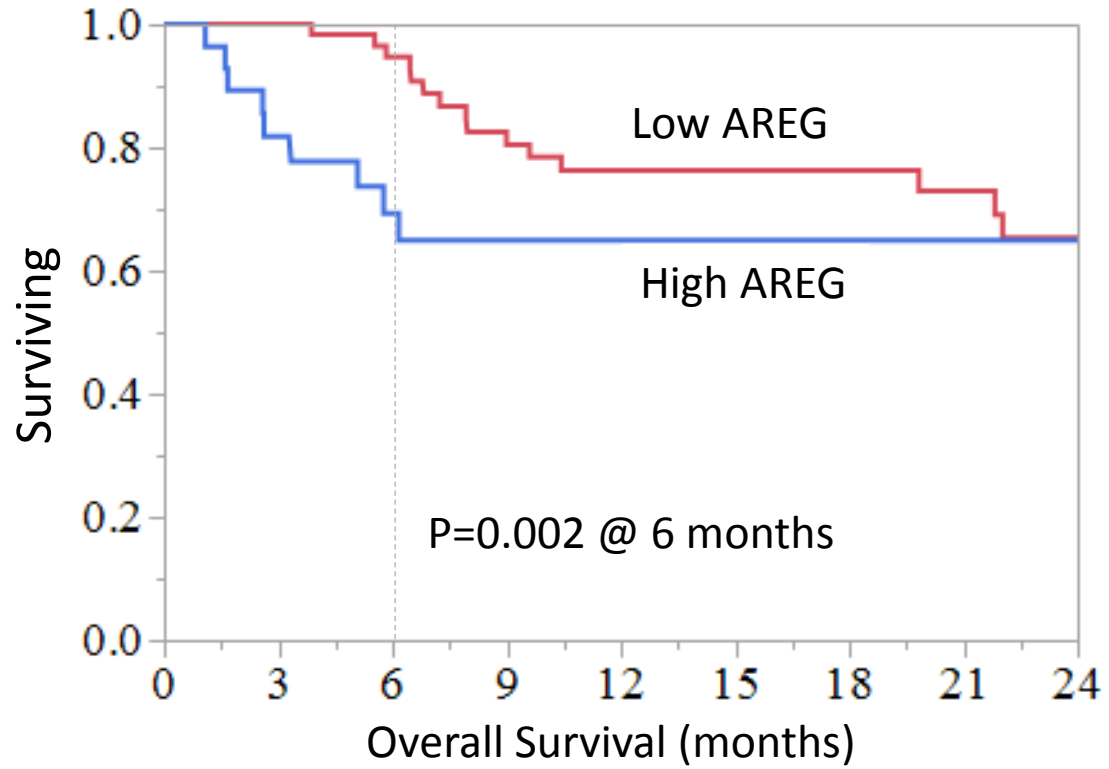

Supplemental Figure 5

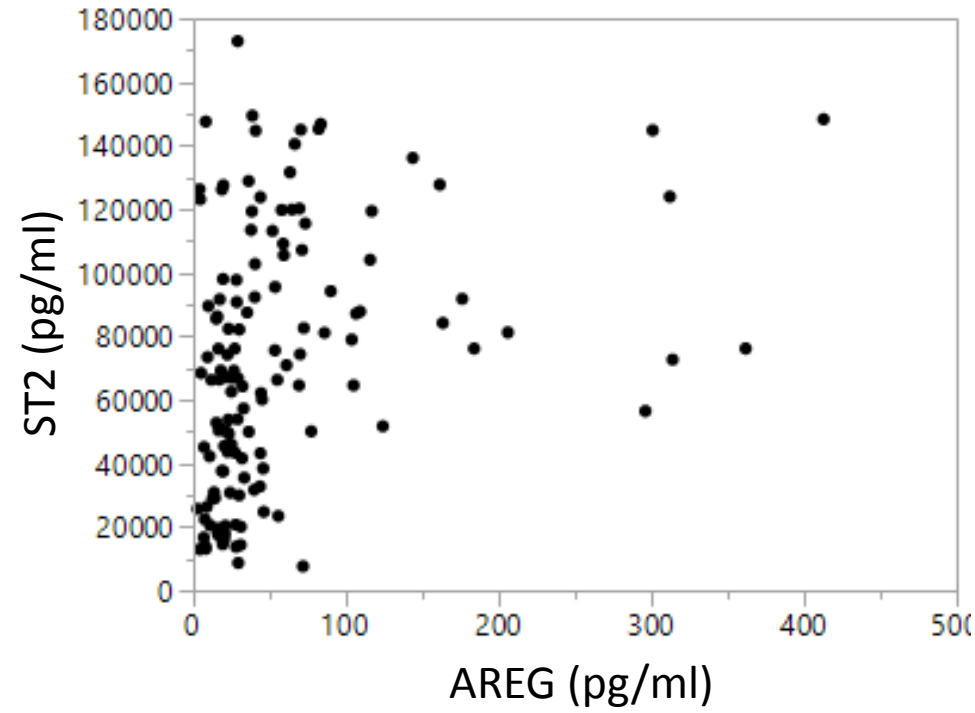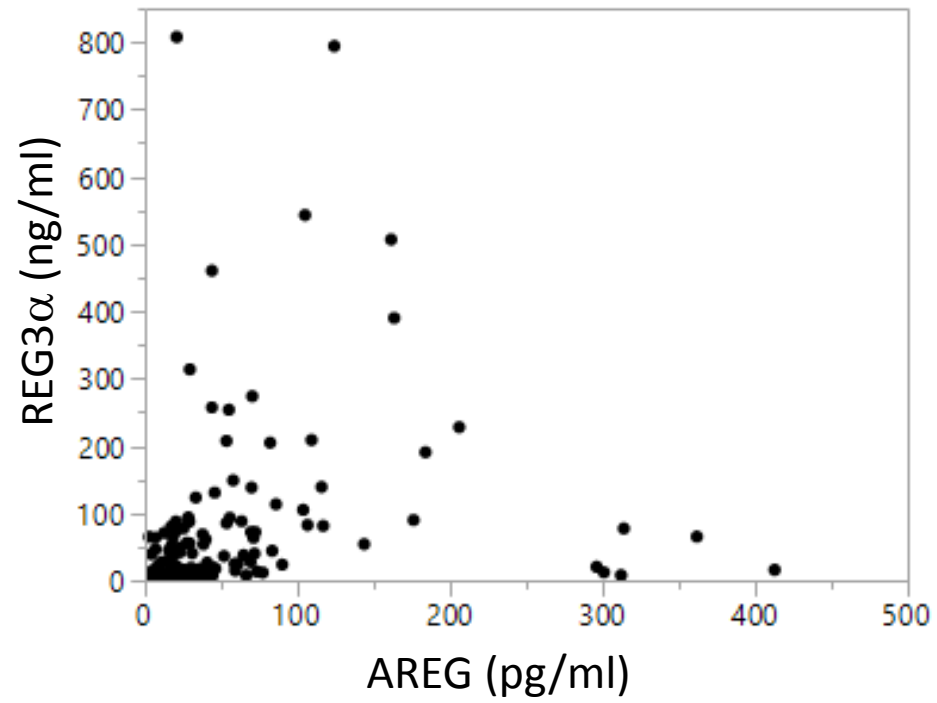

Supplement: ba017343-suppl1.pdf [file ba017343-suppl1.pdf]
